# Supplementary material for: A Metagenomic Analysis of Pandemic Influenza A (2009 H1N1) Infection in Patients from North America
Source: PLoS One. 2010 Oct 18;5(10):e13381. doi: 10.1371/journal.pone.0013381 (PMC2956640; doi:10.1371/journal.pone.0013381)
Supplement: Table S1 — Study patients with 2009 H1N1 influenza (n = 17). (0.07 MB XLS) [file pone.0013381.s003.xls]

## Sheet: 2009h1n1-table1
SAMPLE	AGE	SEX	GEOGRAPHIC LOCATION	DATE OF COLLECTION	OUTPATIENT OR HOSPITALIZED	CLINICAL PRESENTATION
Ont-61	28	M	Ontario	2009-05-01	outpatient	URI
Ont-69	29	M	Ontario	2009-04-01	outpatient	URI
Ont-84	25	F	Ontario	2009-05-01	outpatient	URI
Ont-MT1	27	M	Ontario	2009-04-01	outpatient	URI
Ont-MT2	41	M	Ontario	2009-04-01	outpatient	URI
BC-22	17	M	British Columbia	2009-05-01	outpatient	URI
BC-44	27	M	British Columbia	2009-04-01	outpatient	URI
BC-59	13	F	British Columbia	2009-05-01	outpatient	URI
BC-76	13	F	British Columbia	2009-05-01	outpatient	URI
Mex-619	10	F	Mexico	2009-04-01	hospitalized	URI (? Pneumonia)
Mex-730	15	M	Mexico	2009-04-01	hospitalized	URI (? Pneumonia)
Mex-943	1	M	Mexico	2009-05-01	outpatient	URI
Mex-956	30	F	Mexico	2009-05-01	outpatient	URI
Mex-1225	25	F	Mexico	2009-05-01	hospitalized	URI (? Pneumonia)
Cal-UC2	19	M	California	2009-06-01	hospitalized	pneumonia
Cal-UC6	31	F	California	2009-06-01	hospitalized	pneumonia (pregnant)
Cal-UC12	21	F	California	2009-06-01	hospitalized	pneumona (pregnant)
