# Supplementary material for: A Metagenomic Analysis of Pandemic Influenza A (2009 H1N1) Infection in Patients from North America
Source: PLoS One. 2010 Oct 18;5(10):e13381. doi: 10.1371/journal.pone.0013381 (PMC2956640; doi:10.1371/journal.pone.0013381)
Supplement: Table S2 — 2009 H1N1 single nucleotide polymorphisms in samples Cal-UC2 and BC-22. Nonambiguous SNPs in samples Cal-UC2 and BC-22 were determined by alignment to the A/California/04/2009 (H1N1) reference genome. The nucleotide position is based on the A/California/04/2009 reference sequence. (0.07 MB XLS) [file pone.0013381.s004.xls]

## Sheet: Table S1
Sample	Segment	Gene	Position	Reference Base	SNP	SNP Type	Method
Cal-UC2	1	PB2	454	G	A	Non-synonymous	Illumina
Cal-UC2	1	PB2	463	A	C	Non-synonymous	Illumina
Cal-UC2	1	PB2	525	A	G	Synonymous	Sanger
Cal-UC2	1	PB2	525	A	G	Synonymous	Illumina
BC-22	1	PB2	1218	G	A	Synonymous	Illumina
Cal-UC2	1	PB2	1218	G	A	Synonymous	Illumina
BC-22	1	PB2	1595	C	T	Non-synonymous	Sanger
BC-22	1	PB2	1595	C	T	Non-synonymous	Illumina
BC-22	1	PB2	1872	C	T	Synonymous	Sanger
Cal-UC2	1	PB2	1872	C	T	Synonymous	Sanger
Cal-UC2	1	PB2	1872	C	T	Synonymous	Illumina
BC-22	2	PB1	162	G	A	Synonymous	Illumina
BC-22	2	PB1	297	C	T	Synonymous	Sanger
BC-22	2	PB1	297	C	T	Synonymous	Illumina
BC-22	2	PB1	366	A	C	Synonymous	Illumina
BC-22	2	PB1	1758	A	G	Synonymous	Sanger
BC-22	2	PB1	1758	A	G	Synonymous	Illumina
Cal-UC2	2	PB1	1758	A	G	Synonymous	Sanger
Cal-UC2	2	PB1	1758	A	G	Synonymous	Illumina
BC-22	2	PB1	1949	G	A	Non-synonymous	Sanger
BC-22	3	PA	202	C	T	Non-synonymous	Sanger
BC-22	3	PA	202	C	T	Non-synonymous	Illumina
BC-22	3	PA	670	C	T	Non-synonymous	Sanger
BC-22	3	PA	670	C	T	Non-synonymous	Illumina
Cal-UC2	3	PA	670	C	T	Non-synonymous	Sanger
Cal-UC2	3	PA	670	C	T	Non-synonymous	Illumina
BC-22	3	PA	838	T	G	Non-synonymous	Illumina
BC-22	3	PA	1083	G	A	Synonymous	Sanger
BC-22	3	PA	1083	G	A	Synonymous	Illumina
BC-22	3	PA	1653	G	A	Synonymous	Sanger
BC-22	3	PA	1653	G	A	Synonymous	Illumina
BC-22	3	PA	1986	T	G	Synonymous	Sanger
BC-22	3	PA	1986	T	G	Synonymous	Illumina
Cal-UC2	3	PA	1986	T	G	Synonymous	Sanger
Cal-UC2	3	PA	1986	T	G	Synonymous	Illumina
BC-22	3	PA	2094	C	T	Synonymous	Sanger
BC-22	3	PA	2094	C	T	Synonymous	Illumina
BC-22	4	HA	298	C	T	Non-synonymous	Sanger
BC-22	4	HA	298	C	T	Non-synonymous	Illumina
Cal-UC2	4	HA	298	C	T	Non-synonymous	Sanger
BC-22	4	HA	622	A	C	Non-synonymous	Sanger
Cal-UC2	4	HA	622	A	C	Non-synonymous	Sanger
BC-22	4	HA	640	A	G	Non-synonymous	Sanger
BC-22	4	HA	640	A	G	Non-synonymous	Illumina
Cal-UC2	4	HA	640	A	G	Non-synonymous	Sanger
Cal-UC2	4	HA	640	A	G	Non-synonymous	Illumina
Cal-UC2	4	HA	658	T	A	Non-synonymous	Sanger
Cal-UC2	4	HA	658	T	A	Non-synonymous	Illumina
Cal-UC2	4	HA	717	T	A	Non-synonymous	Sanger
Cal-UC2	4	HA	717	T	A	Non-synonymous	Illumina
BC-22	4	HA	891	A	G	Synonymous	Sanger
BC-22	4	HA	891	A	G	Synonymous	Illumina
Cal-UC2	4	HA	891	A	G	Synonymous	Sanger
Cal-UC2	4	HA	891	A	G	Synonymous	Illumina
Cal-UC2	4	HA	940	C	T	Non-synonymous	Sanger
Cal-UC2	4	HA	940	C	T	Non-synonymous	Illumina
BC-22	4	HA	972	G	A	Synonymous	Sanger
Cal-UC2	4	HA	972	G	A	Synonymous	Sanger
BC-22	4	HA	1012	A	G	Synonymous	Sanger
BC-22	4	HA	1012	A	G	Non-synonymous	Illumina
Cal-UC2	4	HA	1012	A	G	Non-synonymous	Sanger
Cal-UC2	4	HA	1012	A	G	Non-synonymous	Illumina
Cal-UC2	4	HA	1408	C	T	Synonymous	Sanger
Cal-UC2	4	HA	1408	C	T	Synonymous	Illumina
BC-22	5	NP	180	C	T	Synonymous	Sanger
BC-22	5	NP	180	C	T	Synonymous	Illumina
Cal-UC2	5	NP	298	G	A	Non-synonymous	Sanger
Cal-UC2	5	NP	298	G	A	Non-synonymous	Illumina
Cal-UC2	5	NP	324	C	T	Synonymous	Sanger
Cal-UC2	5	NP	324	C	T	Synonymous	Illumina
Cal-UC2	5	NP	447	G	A	Synonymous	Sanger
Cal-UC2	5	NP	508	T	A	Non-synonymous	Sanger
Cal-UC2	5	NP	519	C	A	Synonymous	Illumina
Cal-UC2	5	NP	1143	G	A	Synonymous	Sanger
Cal-UC2	5	NP	1143	G	A	Synonymous	Illumina
Cal-UC2	5	NP	1248	G	A	Synonymous	Sanger
Cal-UC2	5	NP	1248	G	A	Synonymous	Illumina
BC-22	5	NP	1276	A	T	Non-synonymous	Sanger
BC-22	5	NP	1276	A	T	Non-synonymous	Illumina
BC-22	5	NP	1370	C	A	Non-synonymous	Illumina
BC-22	6	NA	12	C	T	Synonymous	Sanger
Cal-UC2	6	NA	12	C	T	Synonymous	Sanger
BC-22	6	NA	15	A	G	Synonymous	Sanger
Cal-UC2	6	NA	189	T	A	Non-synonymous	Illumina
Cal-UC2	6	NA	316	G	A	Non-synonymous	Sanger
Cal-UC2	6	NA	316	G	A	Non-synonymous	Illumina
Cal-UC2	6	NA	742	A	G	Non-synonymous	Sanger
Cal-UC2	6	NA	742	A	G	Non-synonymous	Illumina
Cal-UC2	6	NA	873	G	A	Synonymous	Sanger
Cal-UC2	6	NA	873	G	A	Synonymous	Illumina
BC-22	6	NA	1044	G	A	Synonymous	Sanger
BC-22	6	NA	1044	G	A	Synonymous	Illumina
Cal-UC2	6	NA	1044	G	A	Synonymous	Sanger
Cal-UC2	6	NA	1044	G	A	Synonymous	Illumina
Cal-UC2	6	NA	1395	T	C	Synonymous	Sanger
Cal-UC2	7	M	9	T	C	Synonymous	Illumina
BC-22	7	M	171	G	A	Synonymous	Illumina
Cal-UC2	7	M	492	G	A	Synonymous	Sanger
Cal-UC2	7	M	600	G	A	Synonymous	Sanger
Cal-UC2	7	M	600	G	A	Synonymous	Illumina
BC-22	7	M	977	G	A	Non-synonymous	Sanger
Cal-UC2	8	NS	367	A	G	Non-synonymous	Sanger
Cal-UC2	8	NS	498	T	C	Synonymous	Sanger
BC-22	8	NS	651	G	A	Synonymous	Sanger
BC-22	8	NS	651	G	A	Synonymous	Illumina
Cal-UC2	8	NS	685	G	A	Non-synonymous	Sanger
Cal-UC2	8	NS	685	G	A	Synonymous	Illumina
Cal-UC2	8	NS	814	A	G	Non-synonymous	Sanger
