# Supplementary material for: A Metagenomic Analysis of Pandemic Influenza A (2009 H1N1) Infection in Patients from North America
Source: PLoS One. 2010 Oct 18;5(10):e13381. doi: 10.1371/journal.pone.0013381 (PMC2956640; doi:10.1371/journal.pone.0013381)
Supplement: Table S3 — Primers used for whole-genome Sanger sequencing of 2009 H1N1 samples BC-22 and Cal-UC2. (0.05 MB XLS) [file pone.0013381.s005.xls]

## Sheet: Table S1
Primer Name	Sequence
SwineFlu-HA-844F	GTA CCG AGA TAT GCA TTC GCA ATG G
SwineFlu-HA-869R	CCA TTG CGA ATG CAT ATC TCG GTA C
SwineFlu-NA-708F	GGT TCT TGC TTT ACT GTA ATG ACC G
SwineFlu-NA-732R	CGG TCA TTA CAG TAA AGC AAG AAC C
2009H1N1-NP-1F	GGC GTC TCA AGG CAC CAA ACG ATC
2009H1N1-NP-780R	CTC AGC GTT TCC TGG GTT TCG AC
2009H1N1-NP-720F	CCC AGA GGG CAA TGA TGG ATC AAG
2009H1N1-NP-1520R	CTG TCA TAC TCC TCT GCA TTG TCT C
SwineFlu-HA-934F	TGG GGC CAT TGC CGG TTT CAT TG
SwineFlu-HA-1034R	CTG CAT ATC CTG ACC CCT GCT CA
SwineFlu-HA-561F	GAT ACA GCA AGA AGT TCA AGC CGG
SwineFlu-HA-663R	TTG TCT CCC GGC TCT ACT AGT GTC
H1N1-PB2-1F	GGA GAG AAT AAA AGA ACT GAG AGA TC
H1N1-PB2-1080F	GAG TAC ATG AAG GGT ATG AAG AAT TC
H1N1-PB2-1110R	GAA TTC TTC ATA CCC TTC ATG TAC TC
H1N-PB2-2290R	TTG ATG GCC ATC CGA ATT CTT TTG G
H1N1-PB1-1F	GAT GTC AAT CCG ACT CTA CTT TTC C
H1N1-PB1-1070F	GAC TAG GGA AAG GGT ACA TGT TCG
H1N1-PB1-1090R	CGA ACA TGT ACC CTT TCC CTA GTC
H1N1-PB1-2290R	CCG TCT GAG TTC TTC AAT GGT GGA
H1N1-PA-1F	GGA AGA CTT TGT GCG ACA ATG C
H1N1-PA-1050F	GCA GAG CTA CAG GAC ATT GAA AAT G
H1N1-PA-1070R	CAT TTT CAA TGT CCT GTA GCT CTG C
H1N1-PA-2060R	CTA CTT CAG TGC ATG TGT GAG G
H1N1-PB2-1090F	GAG TAC ATG AAG GGT ATG AAG AAT TC
H1N1-PB2-2280R	GGC TGT CAG TAA GTA TGC TAG
H1N1-PB2-2300R	CTT TTG GTC GCT GTC TGG CTG
H1N1-PB2-1110F	GAG TAC ATG AAG GGT ATG AAG AAT TC
H1N1-PB1-1090F	GAC TAG GGA AAG GGT ACA TGT TCG
H1N1-PA-1050R	CAT TTT CAA TGT CCT GTA GCT CTG C
H1N1-PA-51F	CAA TCC AAT GAT CGT CGA GC
H1N1-PA-480F	CAT TCA CTG GAG AGG AGA TG
H1N1-PA-600R	GTC TCT TCG CCT CTT TCG GAC
H1N1-PA-1200R	CTC TGG CTC ATC ACT GTC ATA C
H1N1-HA-769F	ATT ACT GGA CAC TAG TAG AGC
H1N1-NA-869R	GCA TTT CTT TCC ATT GCG AA
H1N1-HA-900R	GTG TAT CTG AAA TGA TAA TAC CAG
H1N1-HA-790F	GGG AGA CAA AAT AAC ATT CGA AGC
HA-F	CCG CAA ATG CAG ACA CAT TAT GTA TAG
HA-R	CAG AAA CTG ATT GCC CCC AGG G
MP-F	TAA CCG AGG TCG AAA CGT ACG TTC T
MP-R	TAG CTC TAT GTT GAC AAA ATG ACC A
NA-F	GAA TCC AAA YCA RAA GAT AAT AAC CAT TG
NA-R	GTC AAT GGT RAA TGG CAA CTC AGC
NP-F	TCA AGG CAC CAA ACG ATC ATA TGA A
NP-R	GTC ATA CTC CTC TGC ATT GTC TC
NS-F	TGT CAA GCT TTC AGG TAG ACT GT
NS-R	TAA GCT GAA ACG AGA AAG YYC TTA TCT CT
PA-F	TGC GAC AAT GCT TCA ATC CAA TGA TC
PA-R	CTA TTT CAG TGC ATG TGT GAG GAA
PB1-F	TCC AGC GCA AAA TGC CAT AAG CA
PB1-R	TTT TTG CCG TCT GAG TTC TTC AAT GG
PB2-F	GCG AGA TAC TCA CTA AGA CCA CT
PB2-R	GAA TTC TTT TGG TCG CTG TCT GGC
